# Supplementary figures and images for: The Yeast and Hypha Phases of Candida krusei Induce the Apoptosis of Bovine Mammary Epithelial Cells via Distinct Signaling Pathways
Source: MDPI journal article supplement (doi:10.3390/ani13203222), 2023-10-15

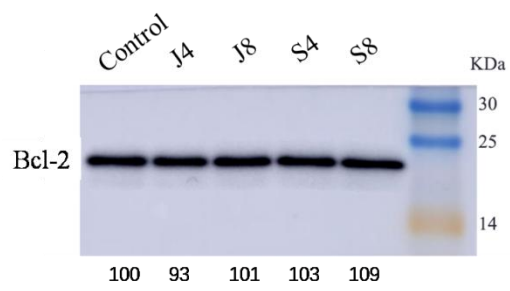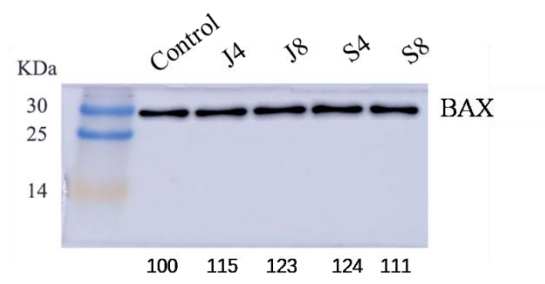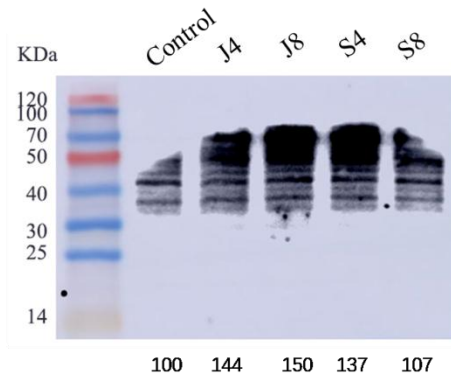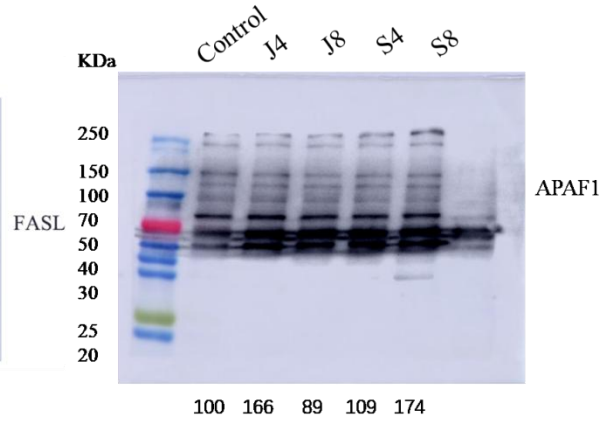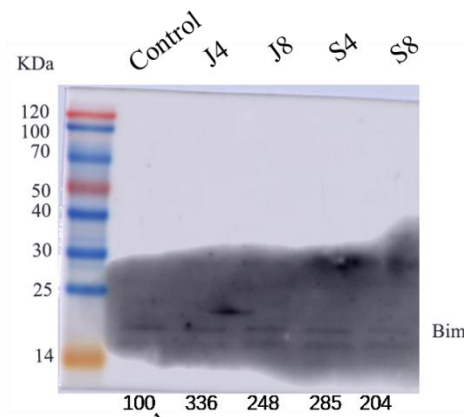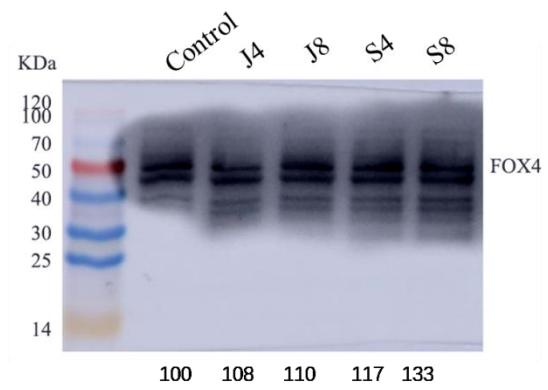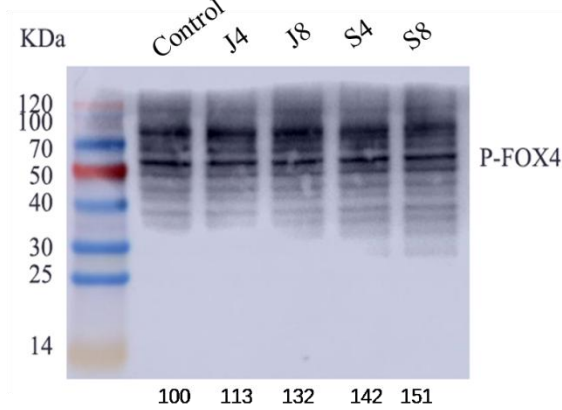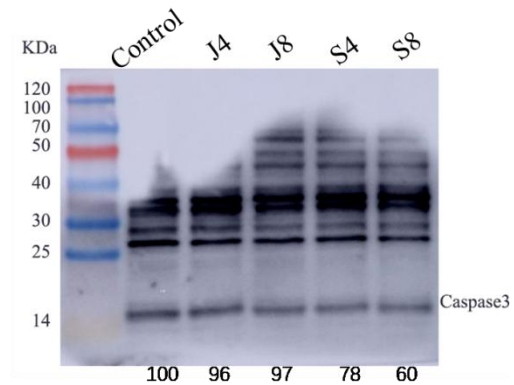

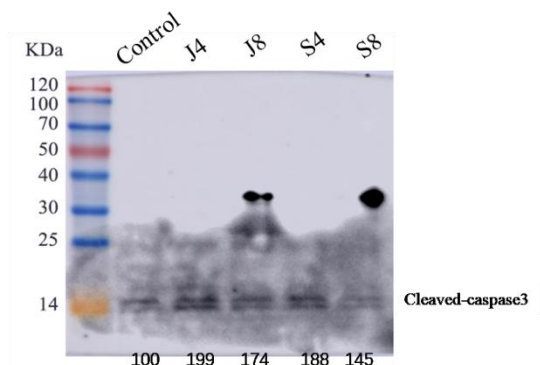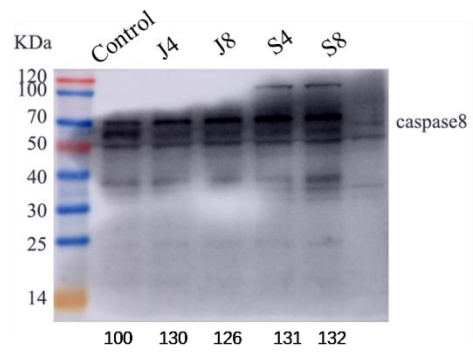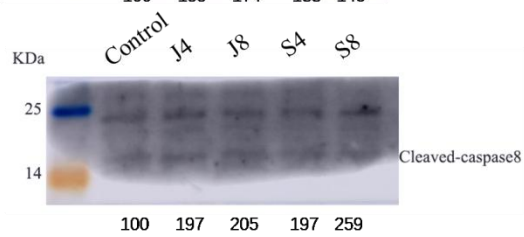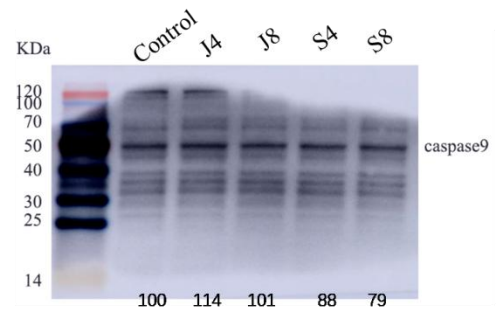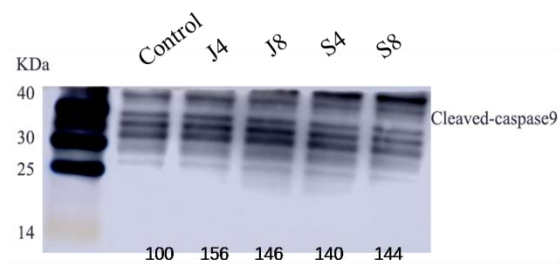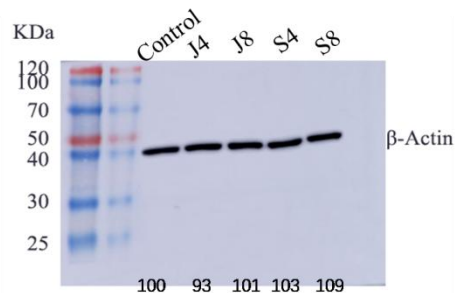

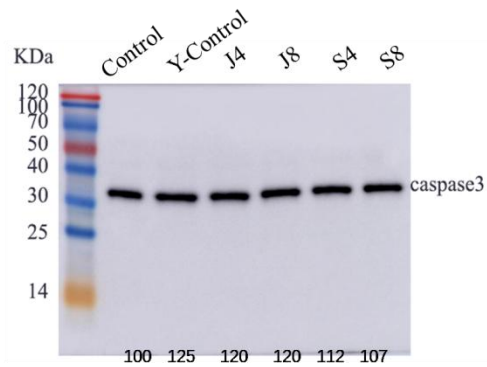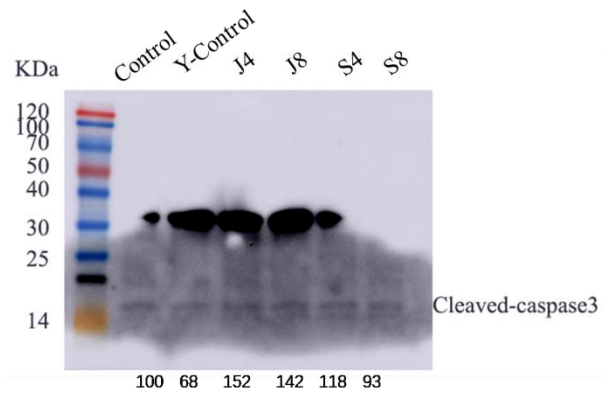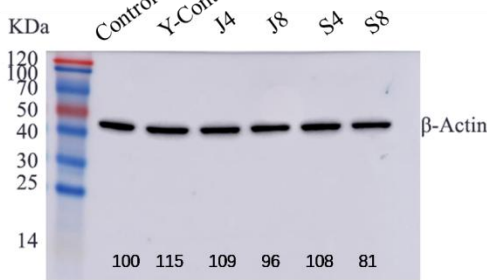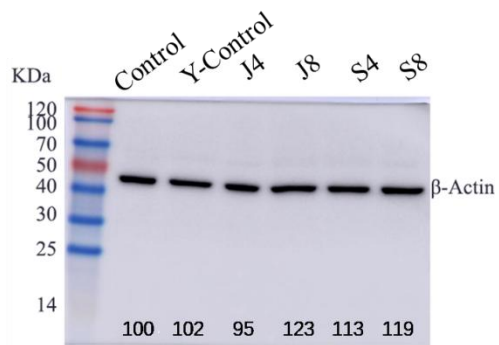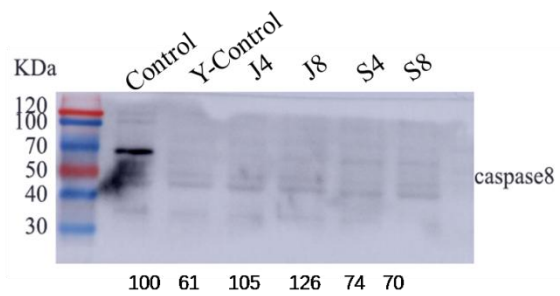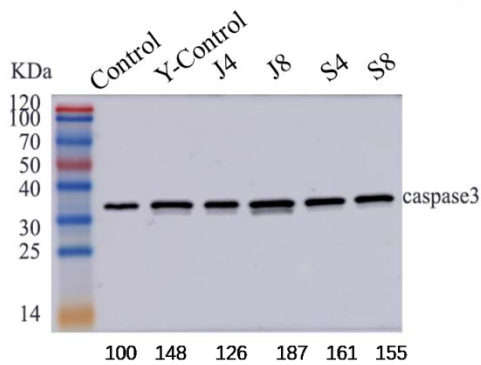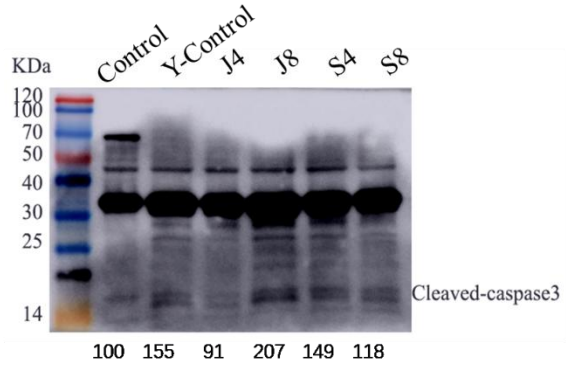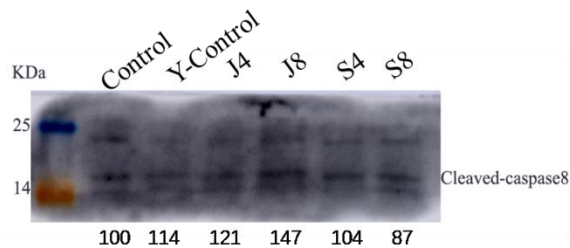

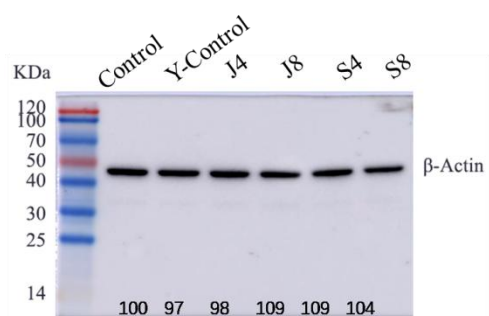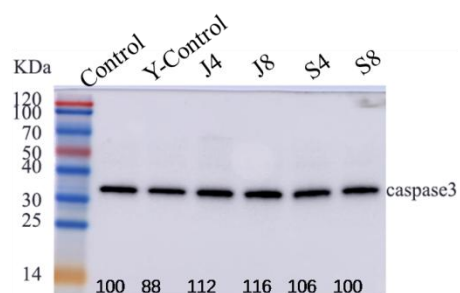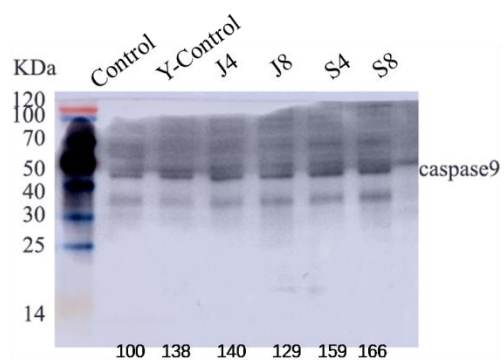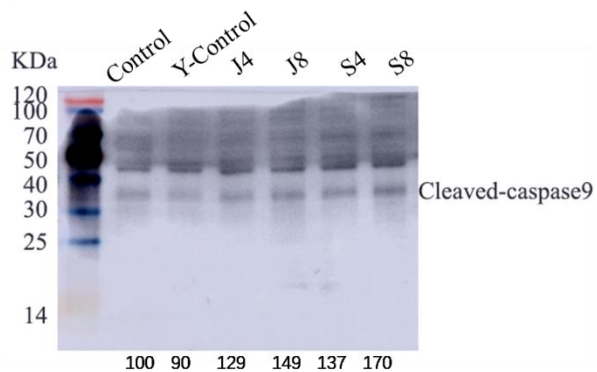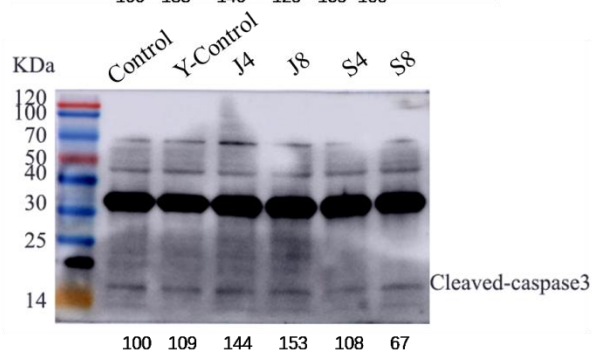

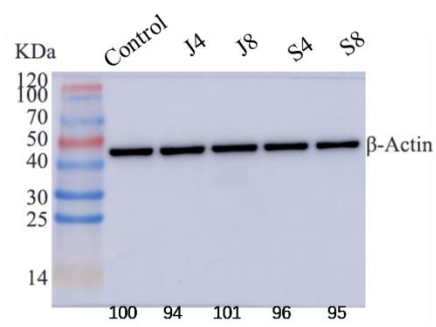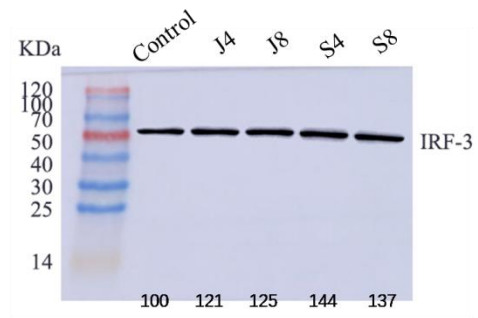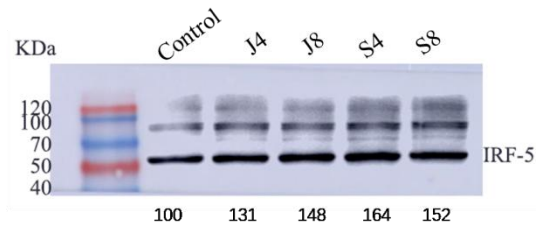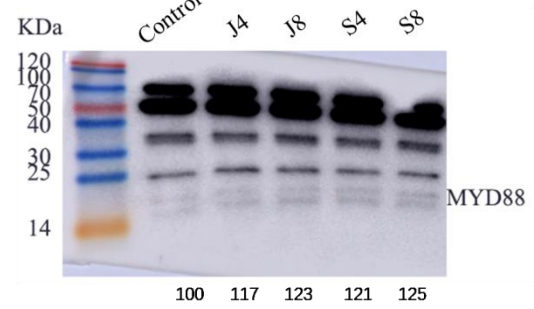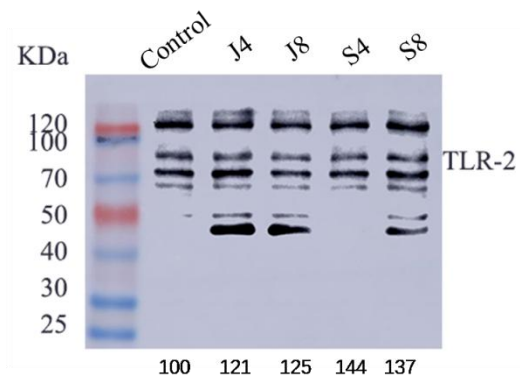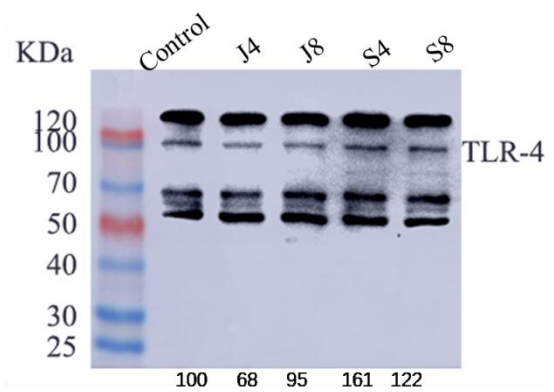

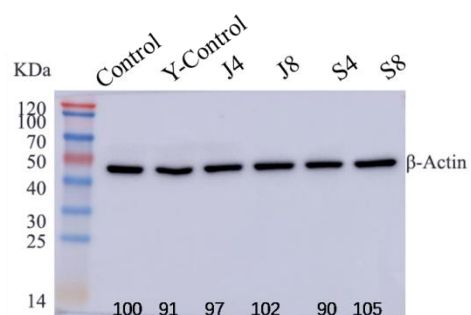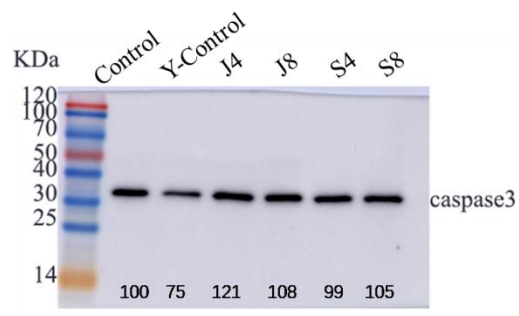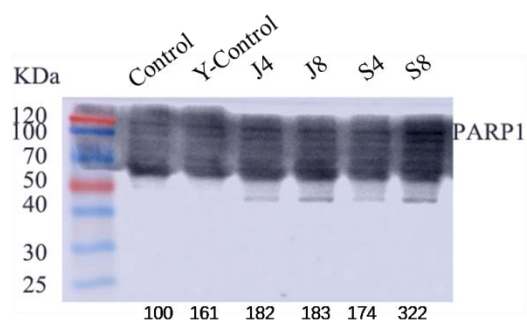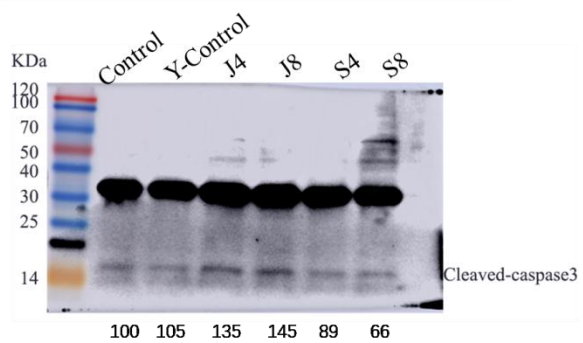

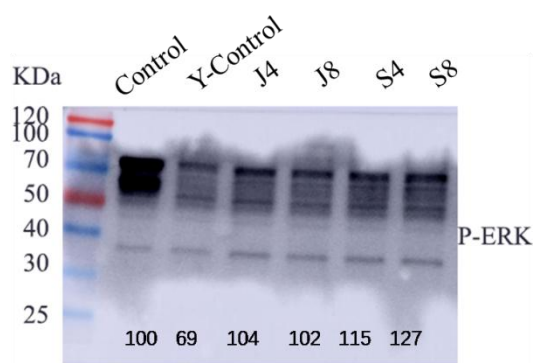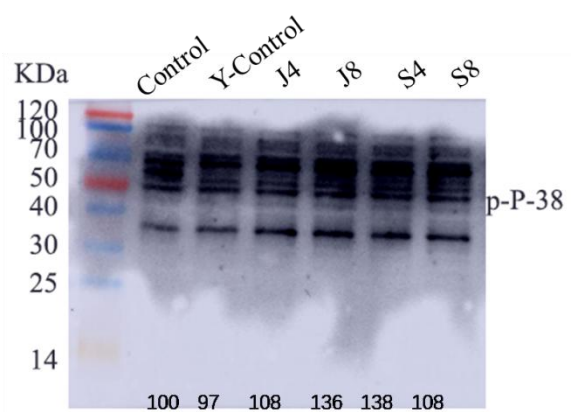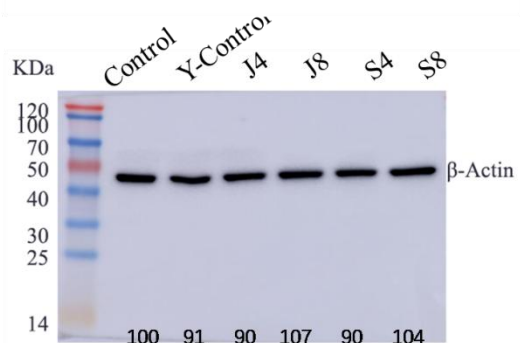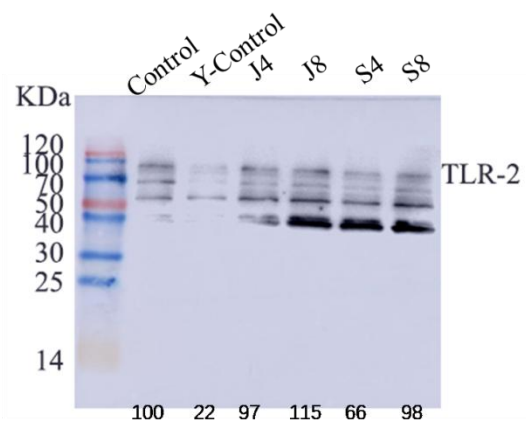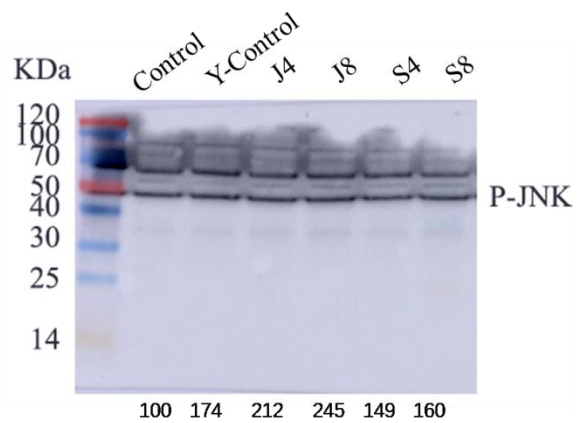



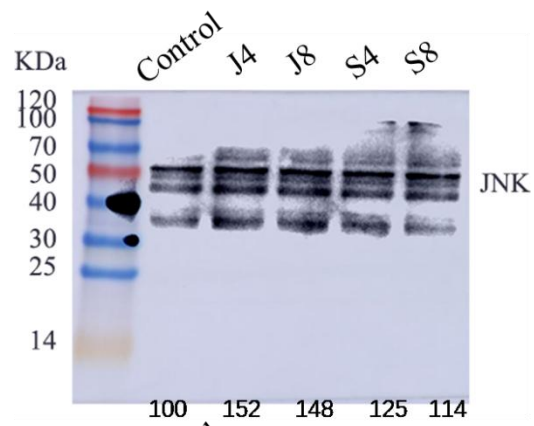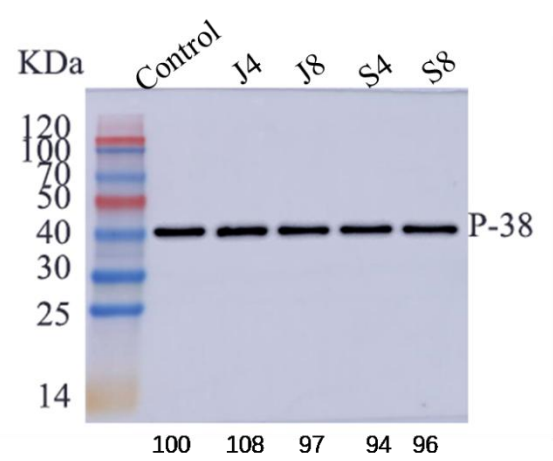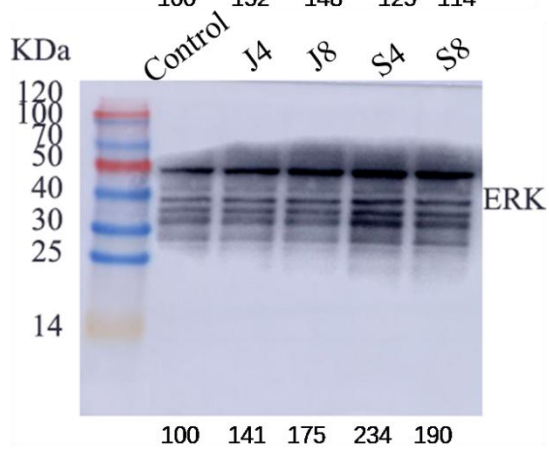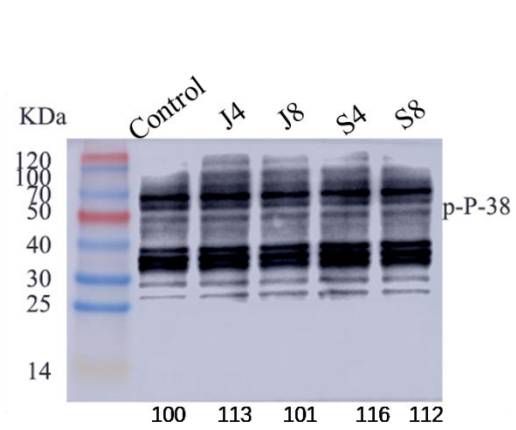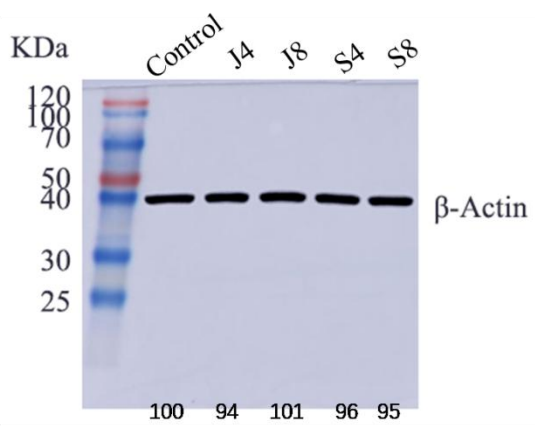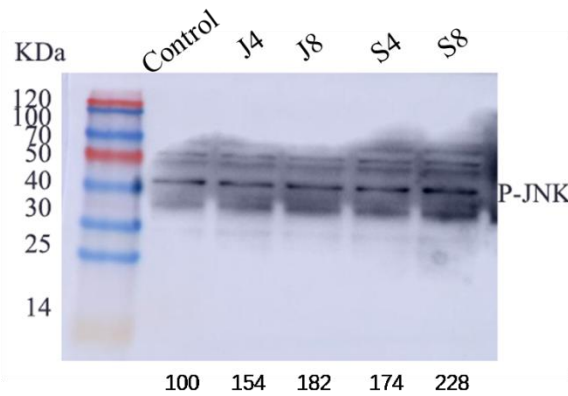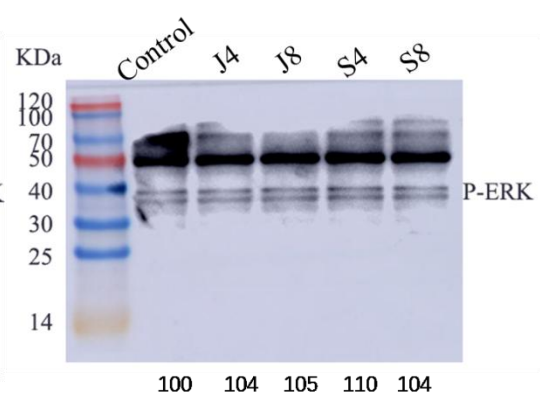



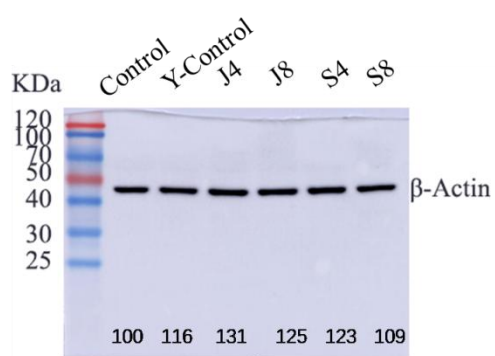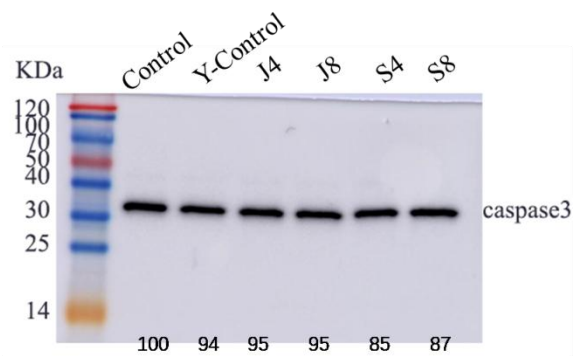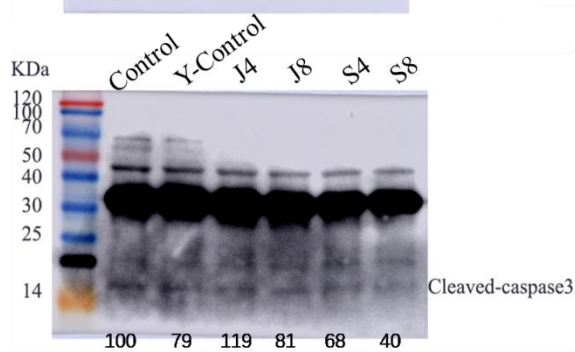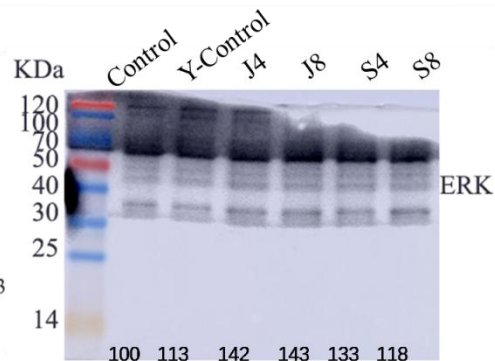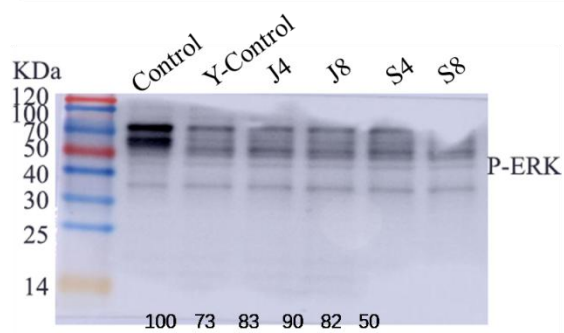

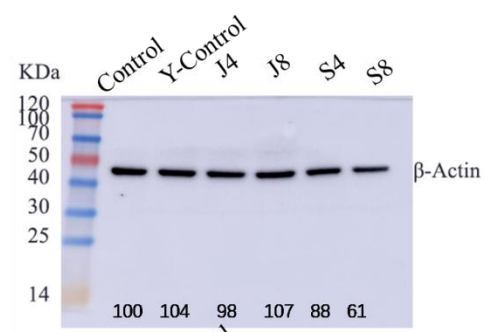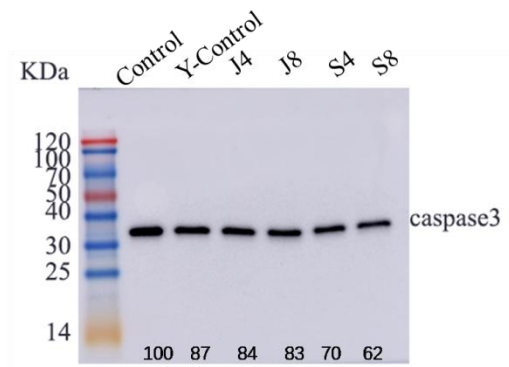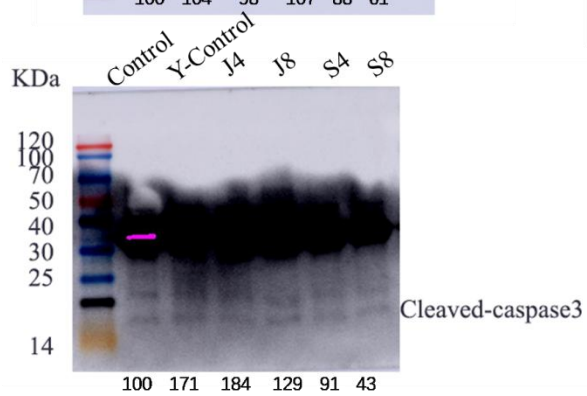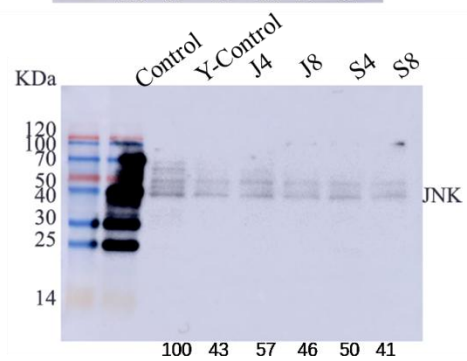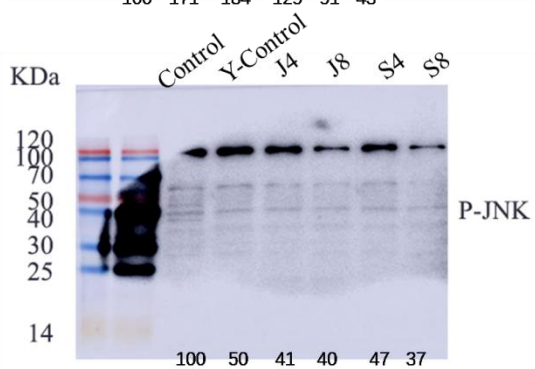

Supplement: s1 [file s1]
